# Supplementary material
Source: PubMed Central journal article supplement (PMC7088266)

— Control  
— FITC-SNA  
— FITC-MALI

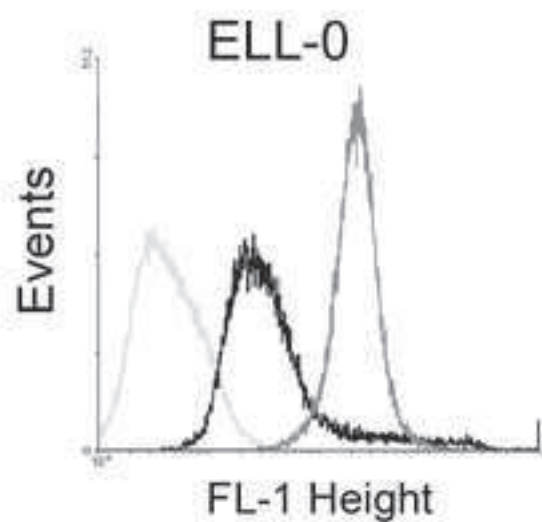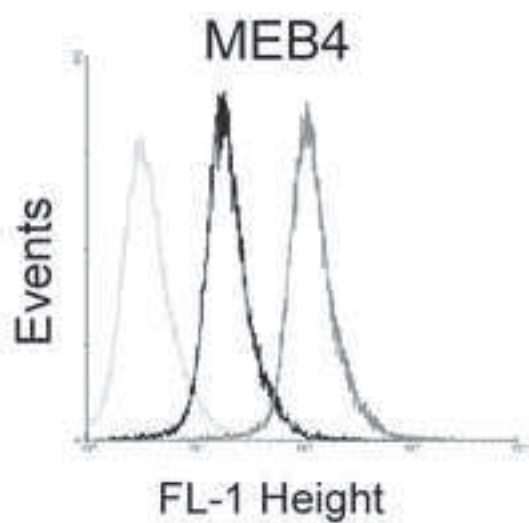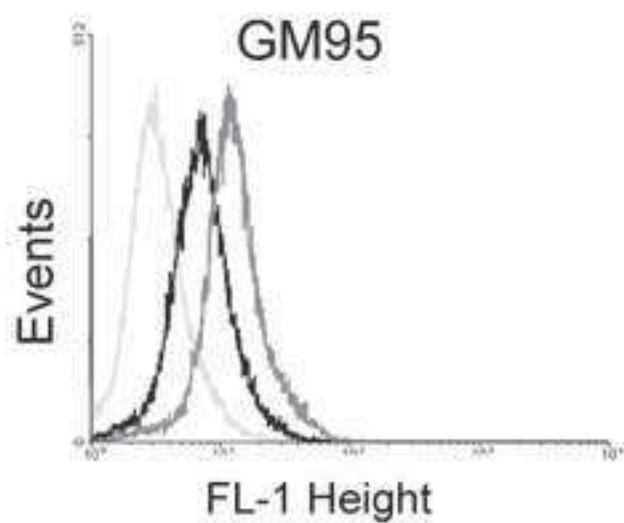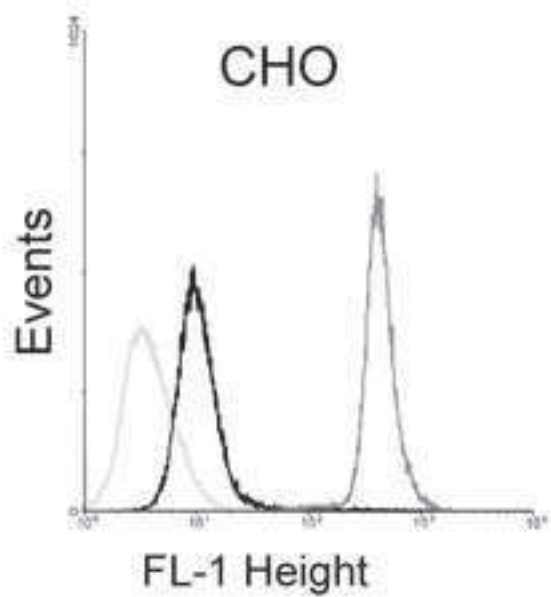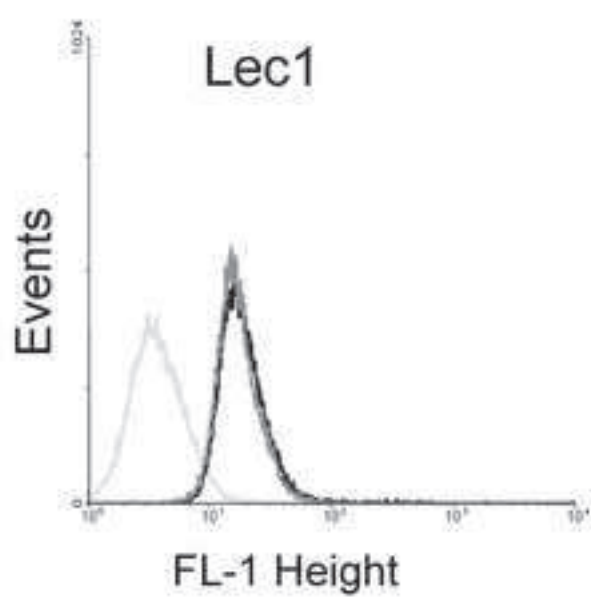

Supplement: 10719_2012_9431_MOESM1_ESM.pdf [file 10719_2012_9431_MOESM1_ESM.pdf]

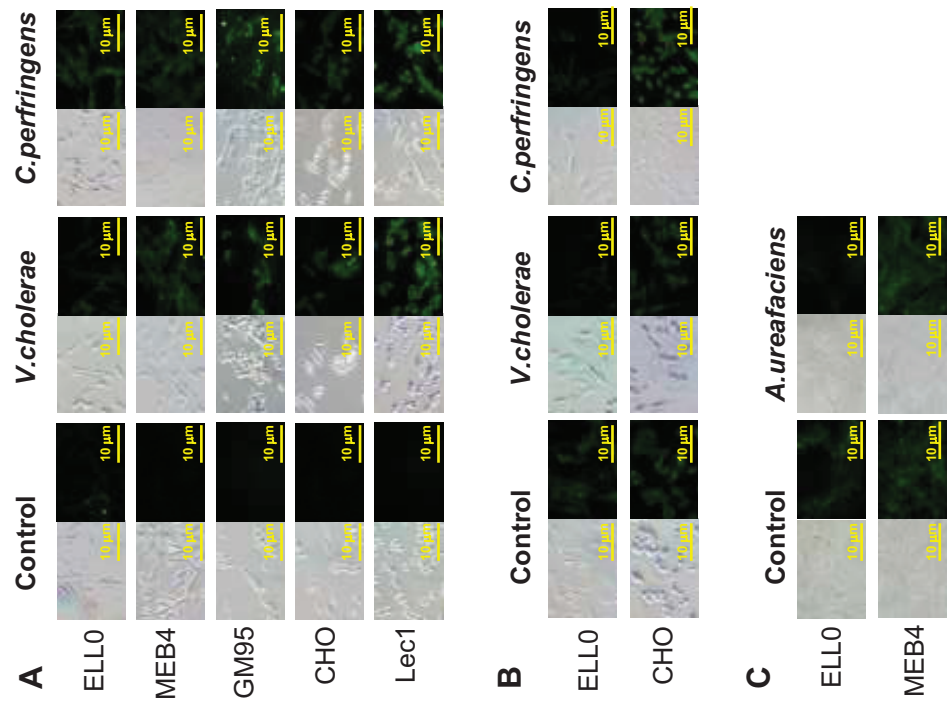

Supplement: 10719_2012_9431_MOESM2_ESM.pdf [file 10719_2012_9431_MOESM2_ESM.pdf]

Supplementary Fig S3

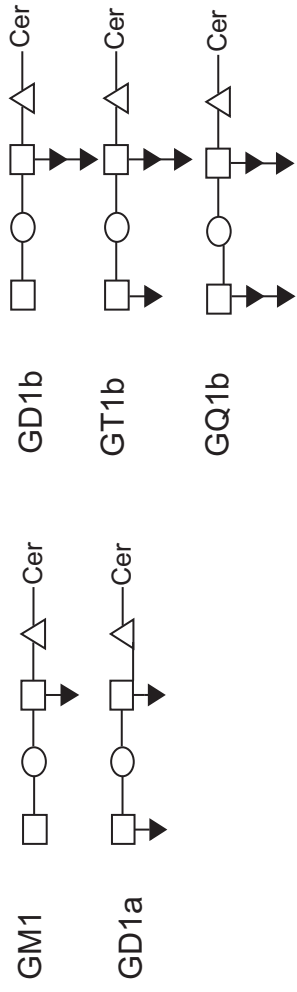

- Galactose
- △ Glucose
- *N*-acetylgalactosamine
- ▼ Sialic acid
- Cer: Ceramide

Supplement: 10719_2012_9431_MOESM3_ESM.pdf [file 10719_2012_9431_MOESM3_ESM.pdf]

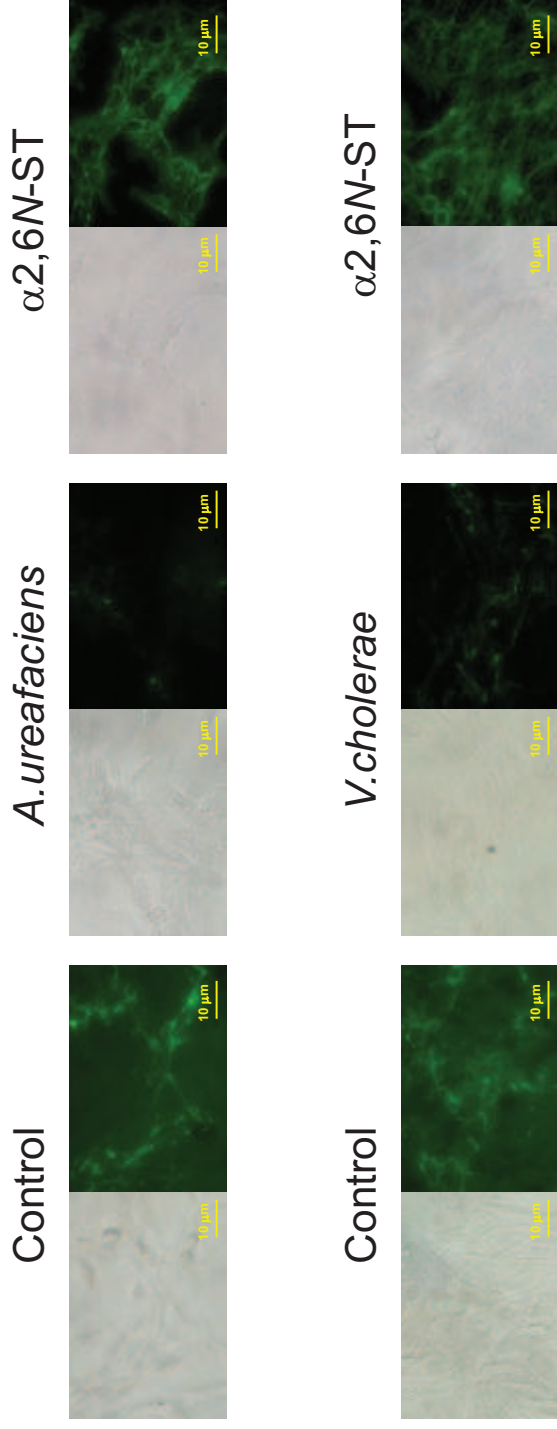

Supplement: 10719_2012_9431_MOESM4_ESM.pdf [file 10719_2012_9431_MOESM4_ESM.pdf]

Supplementary Fig S5

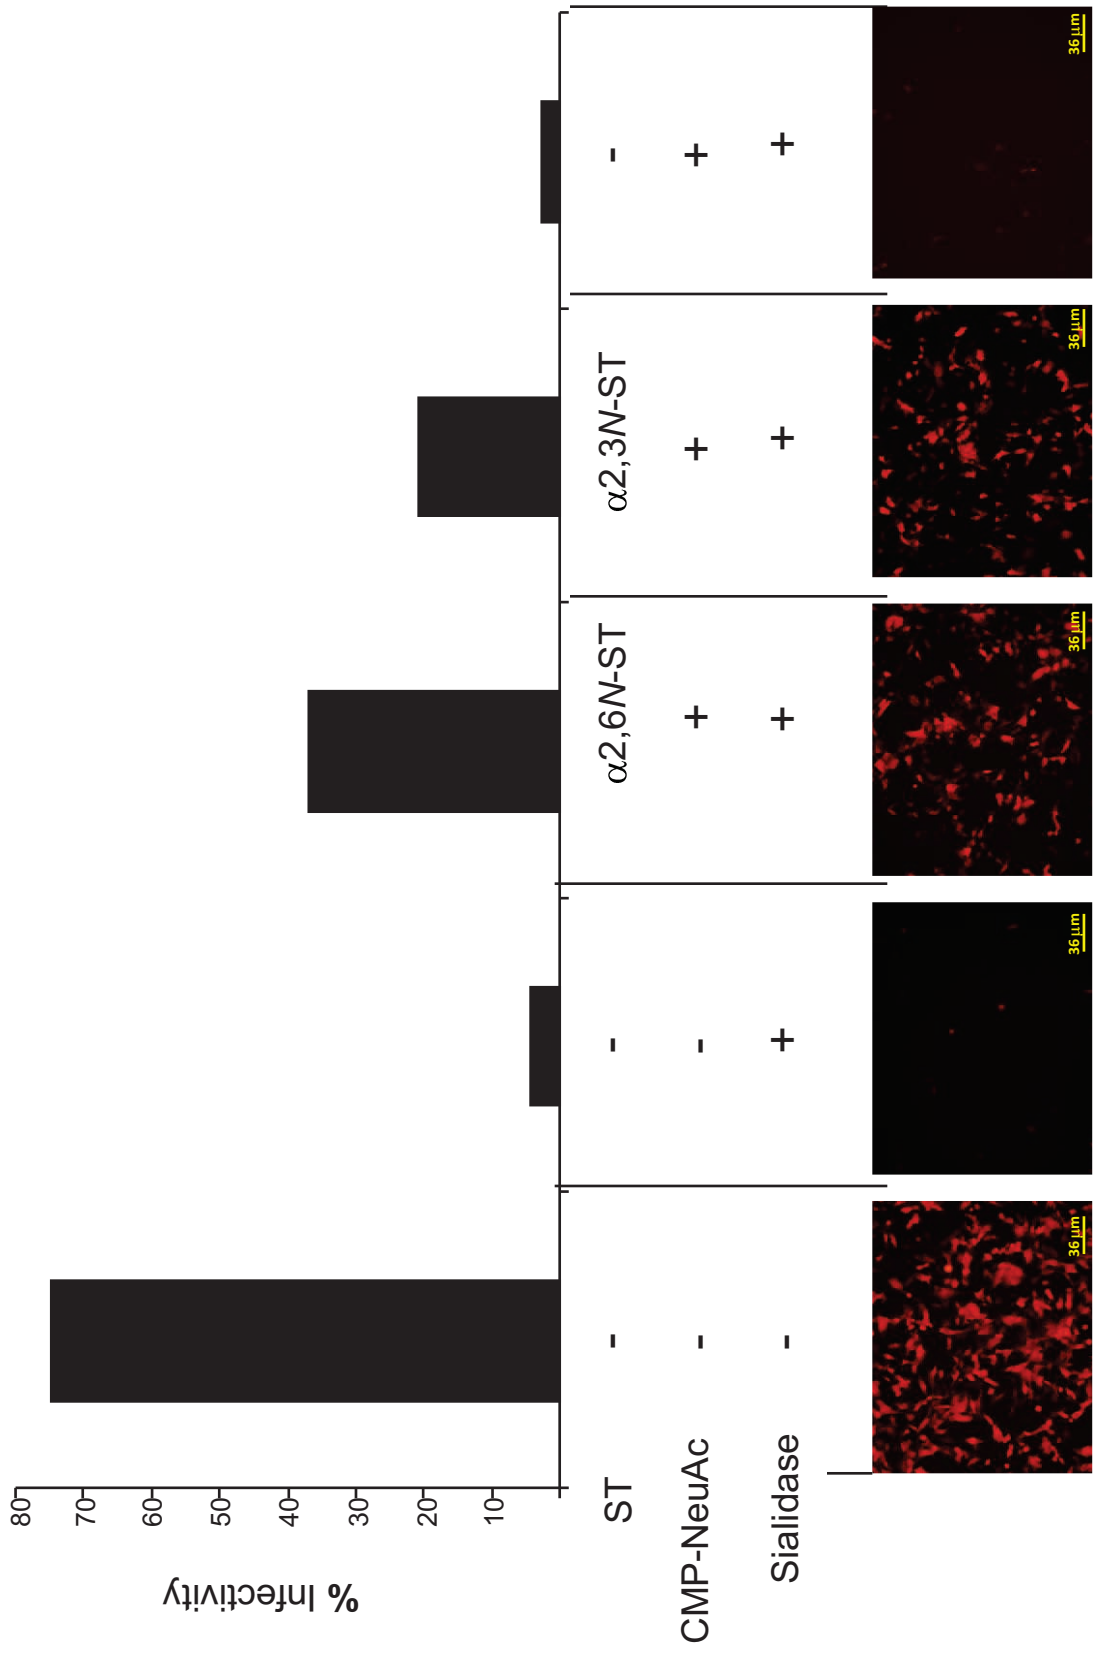

Supplement: 10719_2012_9431_MOESM5_ESM.pdf [file 10719_2012_9431_MOESM5_ESM.pdf]

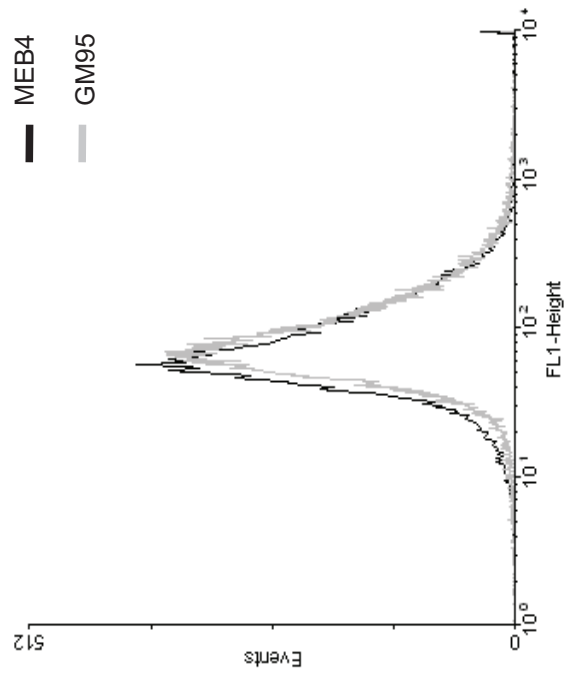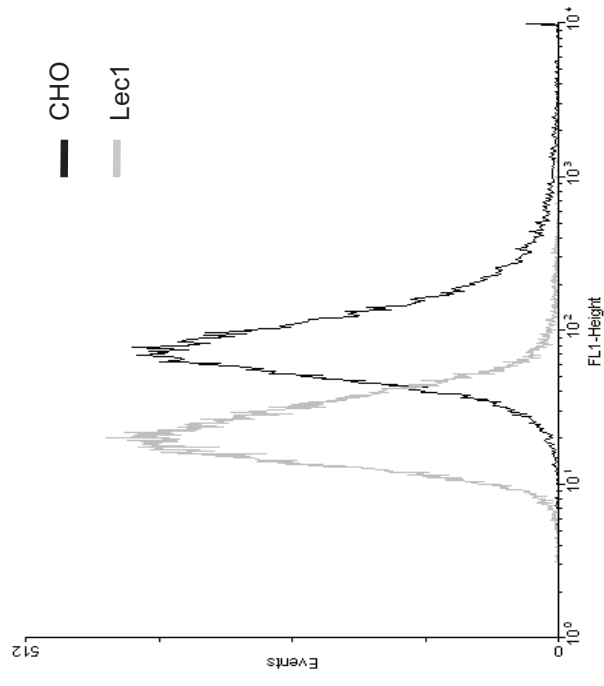

Supplement: 10719_2012_9431_MOESM6_ESM.pdf [file 10719_2012_9431_MOESM6_ESM.pdf]

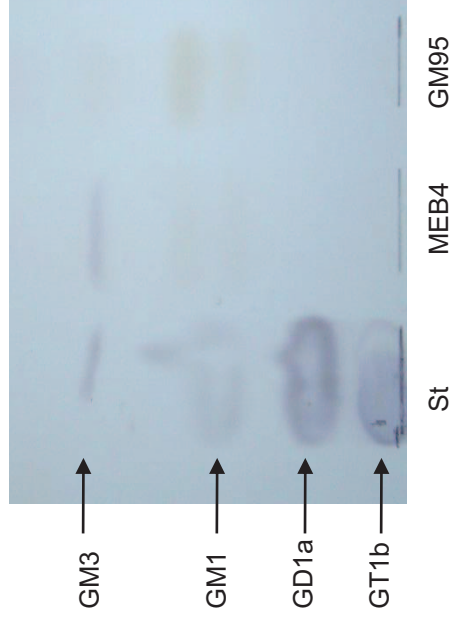

Supplement: 10719_2012_9431_MOESM7_ESM.pdf [file 10719_2012_9431_MOESM7_ESM.pdf]
